# Supplementary material for: Chemical characterization of fine particulate matter emitted by peat fires in Central Kalimantan, Indonesia, during the 2015 El Niño
Source: Copernicus journal article supplement (doi:10.5194/acp-18-2585-2018), 2018-02-21
Supplement: Supplementary file 1 [file acp-18-2585-2018-supplement.zip]

Archive with 2 entries (2 files):
- Tables S1-S2 and Figures S1-S3.xlsx
- acp-18-2585-2018-supplement-title-page.pdf
