# Supplementary material for: Chemical characterization of fine particulate matter emitted by peat fires in Central Kalimantan, Indonesia, during the 2015 El Niño
Source: Copernicus journal article supplement (doi:10.5194/acp-18-2585-2018), 2018-02-21
Supplement: Supplementary file 1 [file acp-18-2585-2018-supplement.zip › acp-18-2585-2018-supplement-title-page.pdf]

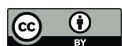

*Supplement of*

**Chemical characterization of fine particulate matter emitted by peat fires in Central Kalimantan, Indonesia, during the 2015 El Niño**

**Thilina Jayarathne et al.**

*Correspondence to:* Elizabeth A. Stone ([betsy-stone@uiowa.edu](mailto:betsy-stone@uiowa.edu))

- [acp-18-2585-2018-supplement-title-page.pdf](#)
- [Tables S1-S2 and Figures S1-S3.xlsx](#)

The copyright of individual parts of the supplement might differ from the CC BY 4.0 License.
