# Supplementary material for: Chemical characterization of fine particulate matter emitted by peat fires in Central Kalimantan, Indonesia, during the 2015 El Niño
Source: Copernicus journal article supplement (doi:10.5194/acp-18-2585-2018), 2018-02-21
Supplement: Supplementary file 1 [file acp-18-2585-2018-supplement.zip › Tables S1-S2 and Figures S1-S3.xlsx]

## Sheet: Table S1
Table S1: Summary of filter samples analyzed in this study, by plume, duration of filter sample collection, and PM2.5 mass concentrations in sampled smoke plumes (with uncertainty).
Plume1	Duration of sampling (min:sec)	PM mass (mg m-3)	PM mass uncertainty (mg m-3)
A-2	00:20:08.843000	19.5968	1.95969
B	00:16:01.828000	1.3031	0.130418
E-1	00:20:04.141000	1.80987	0.181171
E-2	00:19:10.421000	5.59766	0.55979
F-1	00:21:09.094000	17.7137	1.77139
F-2	00:19:31.046000	19.7456	1.97458
I	00:21:28.125000	6.72984	0.672994
J	00:20:04.610000	11.3304	1.13305
L	00:20:04.078000	10.5428	1.05429
M	00:20:08.421000	15.7591	1.57592
O	00:19:55.844000	19.4457	1.94457
P	00:11:24.922000	40.1747	4.01748
Q	00:30:38.672000	12.5865	1.2587
R	00:31:53.156000	10.1244	1.01246
S	00:30:29.219000	12.044	1.20442
T	00:29:53	14.4673	1.44674
V	00:29:46.218000	15.6077	1.56079
W-1	00:09:20.109000	33.8965	3.38966
W-2	00:15:03.063000	19.151	1.91511
X	00:15:28.999000	26.8212	2.68214
Y	00:20:05.281000	13.9409	1.39414
Z	00:20:26.438000	10.6974	1.06978
AA	00:20:00.281000	8.66119	0.86613
1) Additional information each plume is available in Stockwell et al. (2016, Table S1), including sampling location, peat type, burning inclusions, burn depth, surface fuels, temperature, relative humidity, wind, and other sampling notes.

## Sheet: Table S2
Table S2: Emission factors of PM2.5 mass, OC, EC, water-soluble ions, metals and organic species in individual peat burning samples
Plume ID		E-1		E-2		F-1		F-2		I		J		L		M		O		P		Q		R		S		T		V		W-1		W-2		X		Y		Z		AA
Modified combustion efficiency (MCE)		0.813774		0.821814		0.818813		0.815157		0.735374		0.738097		0.739822		0.771217		0.762294		0.792775		0.726		0.763167		0.773286		0.778496		0.824145		0.833483		0.831062		0.725158		0.732134		0.761696		0.740564
Fuel Based Emission Factors (EF)		EF	Unc	EF	Unc	EF	Unc	EF	Unc	EF	Unc	EF	Unc	EF	Unc	EF	Unc	EF	Unc	EF	Unc	EF	Unc	EF	Unc	EF	Unc	EF	Unc	EF	Unc	EF	Unc	EF	Unc	EF	Unc	EF	Unc	EF	Unc	EF	Unc
PM2.5 Mass (g kg-1) - Corrected for background PM		6.04371	0.700226	10.8761	1.2181	17.8748	1.99892	19.3627	2.16593	13.2502	1.48234	11.2498	1.25853	11.1965	1.25248	9.86524	1.10306	12.2411	1.36869	23.1747	2.59136	19.2527	2.15406	21.4587	2.39991	17.9165	2.00357	29.5664	3.30627	24.3196	2.71955	22.5366	2.52073	15.6904	1.75462	23.785	2.66092	16.9546	1.898	16.349	1.83036	19.3694	2.16673
EC (g kg-1)		<0.02	NA	<0.01	NA	0.223766	0.0166641	0.230998	0.0173852	<0.01	NA	<0.006	NA	<0.006	NA	0.113332	0.00833067	0.159815	0.0115927	0.443308	0.0315538	0.386332	0.0279162	0.174541	0.0143882	0.195755	0.0150454	0.257961	0.0196734	0.353892	0.025675	0.236791	0.0183439	0.0898174	0.00896346	0.299994	0.0220071	0.186101	0.0150616	0.176699	0.0149763	0.197514	0.0187439
OC (g kg-1) - Corrected for background and gas adsorption		1.76485	0.619757	6.87629	0.987968	14.3618	1.7078	14.8982	1.7795	8.87524	1.21607	9.68129	1.18993	8.37849	1.06332	8.01837	0.939649	9.39805	1.09976	19.6752	2.25312	10.5471	1.31903	16.7455	2.05439	13.5649	1.65641	26.9489	3.186	14.8853	1.80005	17.575	2.07116	11.5953	1.40413	14.2708	1.69437	9.36807	1.1909	8.93238	1.16172	10.8208	1.45971
	Water-soluble OC fraction	0.157998	0.0254669	0.16584	0.0197364	0.115214	0.012051	0.177893	0.018232	0.0609408	0.00829142	0.0709709	0.00821065	0.0839867	0.00991069	0.0497373	0.00548246	0.0975005	0.0101447	0.132712	0.0134126	0.277713	0.0283202	0.0885961	0.0096138	0.0841101	0.00917687	0.0575793	0.00621044	0.437631	0.0439792	0.117597	0.0123805	0.0940466	0.0103771	0.309013	0.0312198	0.371839	0.0380596	0.354654	0.036574	0.292406	0.0309983
	Water-insoluble OC fraction	0.842002	0.348521	0.83416	0.136135	0.884786	0.10856	0.822107	0.109997	0.939059	0.127839	0.929029	0.11258	0.916013	0.117066	0.950263	0.106127	0.9025	0.106285	0.867288	0.103893	0.722287	0.118077	0.911404	0.112443	0.91589	0.111782	0.942421	0.10731	0.562369	0.118566	0.882403	0.10743	0.905953	0.110778	0.690987	0.112123	0.628161	0.122918	0.645346	0.125509	0.707594	0.129068
Water-soluble Ions (mg kg-1)
	Sodium	NM	NA	1.0817	0.276007	NM	NA	<1.1	NA	<2.2	NA	<1.1	NA	<1.1	NA	<0.49	NA	<0.45	NA	<0.81	NA	<1.2	NA	<1.5	NA	<1.1	NA	<1.6	NA	<1.2	NA	<1.7	NA	<1.2	NA	<1.4	NA	2.47558	0.494334	0.132187	0.0372028	<2.5	NA
	Ammonium	NM	NA	133.646	16.1042	NM	NA	90.6745	10.575	79.4879	10.4499	24.5444	3.66722	28.912	4.12293	24.3118	2.99897	61.9201	7.04856	17.0549	2.57288	162.19	18.4606	33.8165	4.99802	29.3678	4.11612	211.322	24.074	184.698	20.9589	96.0293	11.6274	62.4885	7.66658	148.916	17.1347	145.565	16.706	138.963	16.2529	124.698	15.428
	Potassium	NM	NA	<12.8	NA	NM	NA	<6.2	NA	<12.9	NA	1.00301	0.282175	<6.5	NA	<2.8	NA	0.297254	0.0878532	<4.6	NA	<6.8	NA	<8.6	NA	<6.2	NA	<9.1	NA	27.3109	3.25937	1.36686	0.390123	<6.9	NA	2.51332	0.603774	2.17853	0.53303	2.28734	0.590927	<14.6	NA
	Magnesium	NM	NA	<6.3	NA	NM	NA	<3.0	NA	<6.3	NA	<3.2	NA	<3.2	NA	<1.4	NA	<1.3	NA	<2.3	NA	<3.3	NA	<4.2	NA	<3.0	NA	<4.5	NA	<3.4	NA	<4.7	NA	<3.4	NA	<3.9	NA	<3.7	NA	<4.8	NA	<7.1	NA
	Calcium	NM	NA	<13.4	NA	NM	NA	<6.4	NA	<13.4	NA	<6.8	NA	<6.8	NA	<2.9	NA	<2.7	NA	<4.8	NA	<7.1	NA	<8.9	NA	<6.5	NA	<9.5	NA	<7.3	NA	<10.0	NA	<7.2	NA	<8.5	NA	<7.9	NA	<10.2	NA	<15.2	NA
	Fluoride	NM	NA	<2.1	NA	NM	NA	3.66295	0.778724	<2.1	NA	<1.1	NA	<1.1	NA	<0.46	NA	0.44225	0.186459	0.37778	0.21176	17.1101	2.10609	<1.4	NA	<1.0	NA	<1.5	NA	45.9318	5.22139	4.34826	1.07935	2.81696	0.742111	22.9708	2.77809	20.8022	2.52414	19.3652	2.49951	20.2816	2.88995
	Chloride	NM	NA	103.223	11.5683	NM	NA	76.9569	8.61277	79.0071	8.86891	18.4321	2.09597	27.3126	3.07895	22.3339	2.50298	81.6428	9.12945	24.482	2.75194	100.118	11.2017	19.7748	2.26646	18.8287	2.137	231.498	25.8887	97.2712	10.8842	95.7846	10.7259	52.384	5.87231	96.9799	10.8547	129.692	14.5078	104.566	11.7071	91.9889	10.3238
	Nitrate	NM	NA	2.36589	0.501939	NM	NA	<4.6	NA	<9.6	NA	<4.8	NA	<4.8	NA	<2.1	NA	0.16958	0.0391837	0.219737	0.0514917	1.70273	0.34664	<6.4	NA	5.56511	0.870678	3.72025	0.695375	2.22173	0.435329	<7.1	NA	3.57695	0.63595	1.37639	0.294916	0.125811	0.03023	6.80986	1.13332	4.34344	0.859789
	Sulfate	NM	NA	37.6708	6.92378	NM	NA	25.4514	4.17082	<25.4	NA	6.45818	1.62691	<12.8	NA	1.79342	0.492132	7.25747	1.3579	2.6632	0.744932	39.3416	5.79809	3.01721	0.898786	<12.2	NA	43.1961	6.76496	132.526	15.618	14.5787	3.2981	15.6956	3.13757	35.0116	5.65682	32.7749	5.27901	30.4626	5.49446	16.5832	4.04713
Metals (mg kg-1)
	Al	NM	NA	<18	NA	NM	NA	<8	NA	<18	NA	<9	NA	<9	NA	<4	NA	NM	NA	<6	NA	<9	NA	<12	NA	<8	NA	<12	NA	<10	NA	<13	NA	NM	NA	<11	NA	<10	NA	<13	NA	<20	NA
	Ti	NM	NA	<0.8	NA	NM	NA	<0.4	NA	<0.9	NA	<0.4	NA	<0.4	NA	<0.2	NA	NM	NA	<0.3	NA	<0.5	NA	<0.6	NA	<0.4	NA	<0.6	NA	<0.5	NA	<0.6	NA	NM	NA	<0.5	NA	<0.5	NA	<0.6	NA	<1	NA
	V	NM	NA	<12	NA	NM	NA	<6	NA	<12	NA	<6	NA	<6	NA	<2	NA	NM	NA	<4	NA	<6	NA	<8	NA	<6	NA	<8	NA	<6	NA	<9	NA	NM	NA	<7	NA	<7	NA	<9	NA	<13	NA
	Cr	NM	NA	<7	NA	NM	NA	<3	NA	<7	NA	<3	NA	<3	NA	<1	NA	NM	NA	<2	NA	<4	NA	<4	NA	<3	NA	<5	NA	<5	NA	<5	NA	NM	NA	<4	NA	<4	NA	<5	NA	<7	NA
	Mn	NM	NA	<0.3	NA	NM	NA	<0.1	NA	<0.3	NA	<0.1	NA	<0.1	NA	<0.1	NA	NM	NA	<0.1	NA	<0.2	NA	<0.2	NA	<0.1	NA	<0.2	NA	<0.2	NA	<0.2	NA	NM	NA	<0.2	NA	<0.2	NA	<0.2	NA	<0.3	NA
	Fe	NM	NA	<9	NA	NM	NA	<4	NA	<9	NA	<4	NA	<4	NA	2.01803	1.89075	NM	NA	<3	NA	<5	NA	<6	NA	<4	NA	<6	NA	<5	NA	<6	NA	NM	NA	<5	NA	5.8452	5.13018	<7	NA	<10	NA
	Ni	NM	NA	<0.2	NA	NM	NA	<0.1	NA	<0.2	NA	<0.1	NA	<0.1	NA	<0.05	NA	NM	NA	<0.7	NA	<0.1	NA	<0.1	NA	<0.1	NA	<0.1	NA	<0.1	NA	<0.2	NA	NM	NA	<0.1	NA	<0.1	NA	<0.2	NA	<0.2	NA
	Cu	NM	NA	<25	NA	NM	NA	<12	NA	<26	NA	<13	NA	<13	NA	<6	NA	NM	NA	17.2546	9.43291	<14	NA	<17	NA	<12	NA	<18	NA	<14	NA	<19	NA	NM	NA	<16	NA	<15	NA	<20	NA	<29	NA
	Zn	NM	NA	<7	NA	NM	NA	<4	NA	<7	NA	<4	NA	<4	NA	<2	NA	NM	NA	9.31825	2.83389	<4	NA	<5	NA	<4	NA	<5	NA	<4	NA	<5	NA	NM	NA	<5	NA	<4	NA	<6	NA	<8	NA
	As	NM	NA	<0.2	NA	NM	NA	<0.08	NA	<0.2	NA	<0.08	NA	<0.08	NA	<0.03	NA	NM	NA	<0.06	NA	<0.08	NA	<0.1	NA	<0.08	NA	0.172776	0.11552	<0.9	NA	<0.1	NA	NM	NA	0.180162	0.103731	<0.09	NA	0.153323	0.123839	<0.2	NA
	Se	NM	NA	<0.3	NA	NM	NA	<0.2	NA	<0.3	NA	<0.2	NA	<0.2	NA	<0.07	NA	NM	NA	<0.1	NA	<0.2	NA	<0.2	NA	<0.2	NA	<0.2	NA	<0.2	NA	<0.2	NA	NM	NA	<0.2	NA	<0.2	NA	<0.2	NA	<0.4	NA
	Sr	NM	NA	<2	NA	NM	NA	<1	NA	<2	NA	<1	NA	<2	NA	<0.5	NA	NM	NA	<0.9	NA	<1	NA	<2	NA	<1	NA	<2	NA	<1	NA	<2	NA	NM	NA	<2	NA	<1	NA	<2	NA	<3	NA
	Cd	NM	NA	<0.003	NA	NM	NA	<0.001	NA	<0.003	NA	<0.001	NA	0.0041545	0.00165373	0.000978787	0.000687912	NM	NA	0.00177683	0.00115281	0.0036277	0.00171056	<0.002	NA	<0.002	NA	<0.002	NA	<0.002	NA	<0.002	NA	NM	NA	<0.002	NA	0.00401607	0.00189369	<0.002	NA	<0.004	NA
	Ba	NM	NA	<0.3	NA	NM	NA	<0.1	NA	<0.3	NA	<0.1	NA	<0.1	NA	0.209532	0.0618488	NM	NA	0.158349	0.0972073	<0.1	NA	<0.2	NA	<0.1	NA	<0.2	NA	<0.1	NA	<0.2	NA	NM	NA	<0.2	NA	<0.2	NA	<0.2	NA	<0.3	NA
	Pb	NM	NA	<1	NA	NM	NA	<0.7	NA	<1	NA	<0.7	NA	<0.7	NA	<0.3	NA	NM	NA	0.956757	0.51997	<0.7	NA	<1	NA	<0.7	NA	<1	NA	<0.8	NA	<1	NA	NM	NA	<0.9	NA	<0.8	NA	<1	NA	<2	NA
Organic species (mg kg-1) - Corrected for background and gas adsorption
PAHs
	Anthracene	NM	NA	0.0279012	0.014615	NM	NA	0.0982445	0.0341575	0.0233862	0.0168626	<0.02	NA	<0.02	NA	0.0246306	0.0144027	NM	NA	0.21623	0.0531649	NM	NA	NM	NA	NM	NA	0.26734	0.0703053	NM	NA	NM	NA	<0.02	NA	NM	NA	<0.02	NA	NM	NA	NM	NA
	Fluoranthene	NM	NA	0.265087	0.058476	NM	NA	0.465036	0.105059	0.180951	0.0448649	0.166392	0.0427798	0.19476	0.0471459	0.323977	0.0700208	NM	NA	0.870167	0.185002	NM	NA	NM	NA	NM	NA	2.01262	0.42047	NM	NA	NM	NA	0.366643	0.08091	NM	NA	0.211931	0.0518938	NM	NA	NM	NA
	Pyrene	NM	NA	0.415599	0.087177	NM	NA	0.715304	0.151101	0.224879	0.0502398	0.259232	0.0569721	0.278394	0.0604402	0.507856	0.105935	NM	NA	1.5473	0.320867	NM	NA	NM	NA	NM	NA	3.34349	0.691259	NM	NA	NM	NA	0.469297	0.0993211	NM	NA	0.319929	0.0693628	NM	NA	NM	NA
	Methylfluoranthene	NM	NA	0.142253	0.0293263	NM	NA	1.16382	0.239928	0.244084	0.0503192	0.145673	0.0300313	0.600097	0.123713	0.306591	0.0632053	NM	NA	0.765042	0.157717	NM	NA	NM	NA	NM	NA	1.0992	0.226607	NM	NA	NM	NA	0.599693	0.12363	NM	NA	0.178604	0.0368201	NM	NA	NM	NA
	9-Methylanthracene	NM	NA	<0.03	NA	NM	NA	<0.06	NA	<0.03	NA	<0.03	NA	<0.03	NA	<0.03	NA	NM	NA	<0.06	NA	NM	NA	NM	NA	NM	NA	<0.09	NA	NM	NA	NM	NA	<0.04	NA	NM	NA	<0.04	NA	NM	NA	NM	NA
	Benzo(GHI)fluoranthene	NM	NA	0.0387612	0.0201526	NM	NA	<0.04	NA	<0.02	NA	<0.02	NA	<0.02	NA	<0.02	NA	NM	NA	<0.04	NA	NM	NA	NM	NA	NM	NA	<0.06	NA	NM	NA	NM	NA	<0.03	NA	NM	NA	<0.02	NA	NM	NA	NM	NA
	Cyclopenta(cd)pyrene	NM	NA	0.0306484	0.0148859	NM	NA	0.0681033	0.0309594	<0.02	NA	<0.02	NA	<0.02	NA	<0.01	NA	NM	NA	<0.03	NA	NM	NA	NM	NA	NM	NA	<0.04	NA	NM	NA	NM	NA	<0.02	NA	NM	NA	<0.02	NA	NM	NA	NM	NA
	Benz(a)anthracene	NM	NA	0.166377	0.0377801	NM	NA	0.262044	0.0630063	0.132264	0.0332622	0.0931845	0.027321	0.147156	0.0356098	0.187141	0.041724	NM	NA	0.557421	0.119884	NM	NA	NM	NA	NM	NA	1.45342	0.304018	NM	NA	NM	NA	0.156692	0.0391405	NM	NA	0.120138	0.032556	NM	NA	NM	NA
	Chrysene	NM	NA	0.537935	0.111689	NM	NA	0.643335	0.135378	0.483418	0.100928	0.413223	0.0867276	0.383152	0.0805175	0.385047	0.0804869	NM	NA	0.760043	0.159276	NM	NA	NM	NA	NM	NA	2.70589	0.559496	NM	NA	NM	NA	0.422157	0.0889762	NM	NA	0.232374	0.0510685	NM	NA	NM	NA
	1-Methylchrysene	NM	NA	0.223381	0.0477605	NM	NA	0.476987	0.101693	0.0969005	0.0251197	0.0421173	0.0177931	0.0971777	0.0249717	0.13999	0.0315316	NM	NA	0.289633	0.065657	NM	NA	NM	NA	NM	NA	0.857802	0.181563	NM	NA	NM	NA	0.223717	0.0493894	NM	NA	0.126036	0.0309916	NM	NA	NM	NA
	Retene	NM	NA	0.0909579	0.0467633	NM	NA	0.929456	0.210728	0.144447	0.0595086	<0.05	NA	<0.05	NA	<0.04	NA	NM	NA	<0.09	NA	NM	NA	NM	NA	NM	NA	<0.14	NA	NM	NA	NM	NA	<0.06	NA	NM	NA	<0.06	NA	NM	NA	NM	NA
	Benzo(b)fluoranthene	NM	NA	0.077179	0.0379638	NM	NA	0.0640611	0.071789	0.0653575	0.0435897	0.228171	0.0632441	0.255148	0.0664338	0.28519	0.0682076	NM	NA	0.595464	0.143507	NM	NA	NM	NA	NM	NA	1.07299	0.247933	NM	NA	NM	NA	0.255403	0.071314	NM	NA	0.26908	0.0720523	NM	NA	NM	NA
	Benzo(k)fluoranthene	NM	NA	<0.03	NA	NM	NA	0.0111602	0.0653318	<0.04	NA	<0.04	NA	<0.04	NA	<0.03	NA	NM	NA	0.0707189	0.0703034	NM	NA	NM	NA	NM	NA	0.171533	0.109485	NM	NA	NM	NA	<0.04	NA	NM	NA	<0.04	NA	NM	NA	NM	NA
	Benzo(j)fluoranthene	NM	NA	ND	NA	NM	NA	ND	NA	ND	NA	ND	NA	0.00803498	0.00165645	0.028463	0.0058678	NM	NA	0.121351	0.0250172	NM	NA	NM	NA	NM	NA	0.0446264	0.00919996	NM	NA	NM	NA	ND	NA	NM	NA	ND	NA	NM	NA	NM	NA
	Benzo(e)pyrene	NM	NA	0.370871	0.0792634	NM	NA	0.237087	0.0649644	0.177332	0.0443687	0.328146	0.0723447	0.250044	0.0571215	0.217456	0.049492	NM	NA	0.14764	0.0543919	NM	NA	NM	NA	NM	NA	1.4961	0.315818	NM	NA	NM	NA	0.232222	0.0560607	NM	NA	0.0628749	0.0307523	NM	NA	NM	NA
	Benzo(a)pyrene	NM	NA	0.0507373	0.0181305	NM	NA	0.0785605	0.0343718	0.0251415	0.0185495	0.0390112	0.019864	0.0327463	0.0186958	0.0955943	0.0246794	NM	NA	0.25631	0.0617401	NM	NA	NM	NA	NM	NA	0.602038	0.133112	NM	NA	NM	NA	0.0206646	NA	NM	NA	0.0605272	0.0233665	NM	NA	NM	NA
	Perylene	NM	NA	0.0764064	0.0226138	NM	NA	0.00421801	0.0332282	<0.02	NA	<0.02	NA	0.0240544	0.0197352	0.0350082	0.0178052	NM	NA	0.0384141	0.0358742	NM	NA	NM	NA	NM	NA	0.118818	0.058128	NM	NA	NM	NA	0.0433658	0.0243424	NM	NA	<0.02	NA	NM	NA	NM	NA
	Indeno(1,2,3-cd)pyrene	NM	NA	<0.01	NA	NM	NA	<0.02	NA	<0.01	NA	<0.01	NA	<0.01	NA	<0.01	NA	NM	NA	<0.02	NA	NM	NA	NM	NA	NM	NA	<0.03	NA	NM	NA	NM	NA	<0.01	NA	NM	NA	<0.01	NA	NM	NA	NM	NA
	Benzo(ghi)perylene	NM	NA	0.0382461	0.0246464	NM	NA	0.0565917	0.0492072	<0.03	NA	<0.03	NA	<0.03	NA	0.164147	0.0411564	NM	NA	<0.05	NA	NM	NA	NM	NA	NM	NA	0.836605	0.188419	NM	NA	NM	NA	0.22761	0.0571271	NM	NA	<0.03	NA	NM	NA	NM	NA
	Dibenz(ah)anthracene	NM	NA	<0.04	NA	NM	NA	0.0557129	0.0750508	<0.04	NA	<0.04	NA	<0.04	NA	0.0494765	0.0377473	NM	NA	<0.08	NA	NM	NA	NM	NA	NM	NA	0.52422	0.159791	NM	NA	NM	NA	<0.05	NA	NM	NA	<0.05	NA	NM	NA	NM	NA
	Picene	NM	NA	<0.02	NA	NM	NA	0.294821	0.0750489	<0.03	NA	<0.03	NA	<0.03	NA	0.0855182	0.0278608	NM	NA	<0.05	NA	NM	NA	NM	NA	NM	NA	0.305272	0.0940329	NM	NA	NM	NA	<0.03	NA	NM	NA	<0.03	NA	NM	NA	NM	NA
Hopanes
	17a(H)-22,29,30-Trisnorhopane	NM	NA	2.81463	0.580286	NM	NA	4.10949	0.847293	3.76977	0.777197	3.55733	0.733405	2.93792	0.605715	2.75622	0.568245	NM	NA	5.38214	1.10964	NM	NA	NM	NA	NM	NA	10.0907	2.08036	NM	NA	NM	NA	3.17337	0.654267	NM	NA	1.89352	0.390453	NM	NA	NM	NA
	17b(H)-21a(H)-30-Norhopane	NM	NA	6.50471	1.341	NM	NA	11.7377	2.41982	9.29594	1.91642	9.17847	1.89221	8.07045	1.66379	6.8049	1.40288	NM	NA	13.3182	2.74566	NM	NA	NM	NA	NM	NA	18.762	3.86796	NM	NA	NM	NA	8.76545	1.80707	NM	NA	6.3238	1.30372	NM	NA	NM	NA
	17a(H)-21b(H)-Hopane	NM	NA	1.61702	0.333413	NM	NA	2.2511	0.464242	2.85843	0.589326	2.27681	0.469435	1.85386	0.382249	1.61089	0.33215	NM	NA	3.22697	0.665384	NM	NA	NM	NA	NM	NA	8.19758	1.69009	NM	NA	NM	NA	1.49504	0.308326	NM	NA	1.21959	0.251555	NM	NA	NM	NA
	abb-20R-C27-Cholestane	NM	NA	<0.02	NA	NM	NA	<0.04	NA	<0.02	NA	<0.02	NA	<0.02	NA	<0.02	NA	NM	NA	<0.04	NA	NM	NA	NM	NA	NM	NA	<0.06	NA	NM	NA	NM	NA	<0.03	NA	NM	NA	<0.03	NA	NM	NA	NM	NA
	abb-20S-C27-Cholestane	NM	NA	<0.03	NA	NM	NA	<0.05	NA	<0.03	NA	<0.03	NA	<0.03	NA	<0.03	NA	NM	NA	<0.05	NA	NM	NA	NM	NA	NM	NA	<0.08	NA	NM	NA	NM	NA	<0.04	NA	NM	NA	<0.03	NA	NM	NA	NM	NA
	abb-20R-C28-Ergostane	NM	NA	<0.01	NA	NM	NA	<0.02	NA	<0.01	NA	<0.01	NA	<0.01	NA	<0.01	NA	NM	NA	<0.02	NA	NM	NA	NM	NA	NM	NA	<0.03	NA	NM	NA	NM	NA	<0.01	NA	NM	NA	<0.01	NA	NM	NA	NM	NA
	abb-20R-C29-Sitostane	NM	NA	<0.02	NA	NM	NA	<0.03	NA	<0.02	NA	<0.02	NA	<0.02	NA	<0.02	NA	NM	NA	<0.03	NA	NM	NA	NM	NA	NM	NA	<0.05	NA	NM	NA	NM	NA	<0.02	NA	NM	NA	<0.02	NA	NM	NA	NM	NA
n-Alkanes
	Tetradecane	NM	NA	<0.1	NA	NM	NA	<0.2	NA	<0.12	NA	<0.12	NA	<0.12	NA	<0.1	NA	NM	NA	<0.21	NA	NM	NA	NM	NA	NM	NA	<0.32	NA	NM	NA	NM	NA	<0.14	NA	NM	NA	<0.13	NA	NM	NA	NM	NA
	Pentadecane	NM	NA	<0.12	NA	NM	NA	2.60818	0.554641	4.07873	0.845824	1.10746	0.235693	0.884238	0.18725	0.613681	0.133504	NM	NA	0.110835	0.0259563	NM	NA	NM	NA	NM	NA	1.2743	0.281832	NM	NA	NM	NA	0.115017	0.0256792	NM	NA	<0.15	NA	NM	NA	NM	NA
	Hexadecane	NM	NA	<0.06	NA	NM	NA	<0.13	NA	<0.08	NA	<0.08	NA	<0.08	NA	<0.06	NA	NM	NA	<0.14	NA	NM	NA	NM	NA	NM	NA	2.32052	0.478601	NM	NA	NM	NA	<0.09	NA	NM	NA	<0.09	NA	NM	NA	NM	NA
	Heptadecane	NM	NA	<0.07	NA	NM	NA	<0.15	NA	<0.09	NA	<0.09	NA	<0.08	NA	<0.07	NA	NM	NA	<0.15	NA	NM	NA	NM	NA	NM	NA	3.34139	0.689984	NM	NA	NM	NA	<0.1	NA	NM	NA	<0.1	NA	NM	NA	NM	NA
	Octadecane	NM	NA	1.3555	0.28471	NM	NA	3.44609	0.722205	0.337995	0.0762828	1.1514	0.245735	1.04583	0.224322	2.67533	0.55571	NM	NA	12.918	2.66788	NM	NA	NM	NA	NM	NA	41.2527	8.50811	NM	NA	NM	NA	3.4448	0.715783	NM	NA	0.364366	0.0827396	NM	NA	NM	NA
	Nonadecane	NM	NA	3.76419	0.776961	NM	NA	9.38867	1.93818	0.978405	0.202588	3.38443	0.699267	3.53894	0.731039	9.05937	1.86849	NM	NA	29.9643	6.17868	NM	NA	NM	NA	NM	NA	116.116	23.9389	NM	NA	NM	NA	7.44345	1.53583	NM	NA	0.96626	0.200293	NM	NA	NM	NA
	Eicosane	NM	NA	10.3116	2.12606	NM	NA	18.8874	3.89446	6.73015	1.38788	11.2258	2.31464	12.3415	2.54462	17.9343	3.69747	NM	NA	48.609	10.0214	NM	NA	NM	NA	NM	NA	210.739	43.4452	NM	NA	NM	NA	14.6405	3.01859	NM	NA	3.25124	0.670772	NM	NA	NM	NA
	Heneicosane	NM	NA	22.0144	4.53925	NM	NA	36.771	7.58324	23.4872	4.84318	28.4322	5.8626	24.6812	5.08933	26.0144	5.36391	NM	NA	68.1446	14.05	NM	NA	NM	NA	NM	NA	300.028	61.8531	NM	NA	NM	NA	26.5476	5.47438	NM	NA	6.41676	1.32601	NM	NA	NM	NA
	Docosane	NM	NA	24.7373	5.10092	NM	NA	37.3544	7.70434	27.5743	5.68612	31.9293	6.58402	30.1786	6.22297	29.2599	6.03337	NM	NA	71.6076	14.7649	NM	NA	NM	NA	NM	NA	339.683	70.0289	NM	NA	NM	NA	27.6177	5.69555	NM	NA	6.04231	1.24777	NM	NA	NM	NA
	Tricosane	NM	NA	37.7171	7.77573	NM	NA	55.4871	11.4395	38.3364	7.90348	35.9259	7.40658	37.4716	7.7252	33.0117	6.80575	NM	NA	87.1233	17.9613	NM	NA	NM	NA	NM	NA	274.589	56.6083	NM	NA	NM	NA	34.6407	7.14172	NM	NA	12.1022	2.49558	NM	NA	NM	NA
	Tetracosane	NM	NA	33.5877	6.92428	NM	NA	42.4478	8.75085	31.9188	6.58023	26.94	5.55383	28.6622	5.90886	24.0924	4.96677	NM	NA	69.3287	14.2925	NM	NA	NM	NA	NM	NA	257.172	53.0174	NM	NA	NM	NA	34.3629	7.0841	NM	NA	8.45276	1.74258	NM	NA	NM	NA
	Pentacosane	NM	NA	47.4988	9.79342	NM	NA	60.7795	12.5341	45.8041	9.44465	34.9374	7.20502	41.536	8.56486	30.5653	6.30314	NM	NA	77.8376	16.0503	NM	NA	NM	NA	NM	NA	300.03	61.8552	NM	NA	NM	NA	53.6986	11.0724	NM	NA	13.9281	2.87674	NM	NA	NM	NA
	Hexacosane	NM	NA	40.6795	8.38726	NM	NA	37.4888	7.73232	30.4155	6.27202	31.0546	6.40382	31.0433	6.40136	19.1495	3.94956	NM	NA	62.971	12.9845	NM	NA	NM	NA	NM	NA	243.789	50.2603	NM	NA	NM	NA	41.7671	8.61222	NM	NA	9.14153	1.88895	NM	NA	NM	NA
	Heptacosane	NM	NA	53.1638	10.9604	NM	NA	59.538	12.2755	45.5472	9.39044	43.7795	9.02606	40.5972	8.37	28.7088	5.91915	NM	NA	82.6869	17.0475	NM	NA	NM	NA	NM	NA	283.548	58.4557	NM	NA	NM	NA	55.7929	11.5027	NM	NA	18.1174	3.73665	NM	NA	NM	NA
	Octacosane	NM	NA	42.3235	8.72749	NM	NA	57.8314	11.9292	37.0894	7.64984	39.7723	8.2029	34.2098	7.05635	27.0239	5.57465	NM	NA	73.9499	15.2513	NM	NA	NM	NA	NM	NA	259.102	53.4194	NM	NA	NM	NA	50.2502	10.3631	NM	NA	12.9645	2.68289	NM	NA	NM	NA
	Nonacosane	NM	NA	58.2368	12.0075	NM	NA	74.9728	15.4613	62.1454	12.8138	58.7955	12.1234	48.6774	10.0378	39.8456	8.21677	NM	NA	93.8434	19.3511	NM	NA	NM	NA	NM	NA	284.082	58.5687	NM	NA	NM	NA	63.2953	13.0516	NM	NA	19.9415	4.11832	NM	NA	NM	NA
	Triacontane	NM	NA	41.2536	8.51301	NM	NA	56.1958	11.6106	40.1246	8.28419	42.1392	8.69956	37.5864	7.76127	31.6689	6.53968	NM	NA	61.4939	12.7033	NM	NA	NM	NA	NM	NA	206.103	42.5075	NM	NA	NM	NA	46.3914	9.57822	NM	NA	15.6456	3.25969	NM	NA	NM	NA
	Hentriacontane	NM	NA	62.2649	12.8397	NM	NA	84.6274	17.4574	67.8656	13.9955	64.7288	13.3493	55.7164	11.4917	42.9846	8.86671	NM	NA	88.5367	18.264	NM	NA	NM	NA	NM	NA	209.342	43.1682	NM	NA	NM	NA	78.4188	16.172	NM	NA	22.1279	4.57886	NM	NA	NM	NA
	Dotriacontane	NM	NA	24.6772	5.09608	NM	NA	42.9455	8.87448	29.8272	6.1595	25.9154	5.3551	24.5318	5.06955	18.2705	3.77843	NM	NA	47.9073	9.89726	NM	NA	NM	NA	NM	NA	101.857	21.0206	NM	NA	NM	NA	39.2186	8.09583	NM	NA	8.26851	1.75044	NM	NA	NM	NA
	Tritriacontane	NM	NA	26.3064	5.42857	NM	NA	37.0627	7.65662	25.0023	5.16252	26.9851	5.57099	26.0162	5.37089	17.1499	3.54382	NM	NA	41.9579	8.66547	NM	NA	NM	NA	NM	NA	80.6154	16.6378	NM	NA	NM	NA	37.0005	7.63528	NM	NA	9.45243	1.97506	NM	NA	NM	NA
	Tetratriacontane	NM	NA	8.44934	1.76354	NM	NA	15.1615	3.17612	10.1392	2.11636	10.2311	2.13611	10.1955	2.12675	8.87503	1.8504	NM	NA	25.6206	5.31515	NM	NA	NM	NA	NM	NA	47.8887	9.91302	NM	NA	NM	NA	15.8786	3.29597	NM	NA	4.35796	0.970722	NM	NA	NM	NA
	Pentatriacontane	NM	NA	5.92098	1.27339	NM	NA	9.69835	2.1328	6.79589	1.46735	5.39954	1.19875	5.5599	1.22316	4.76693	1.04793	NM	NA	12.4556	2.68427	NM	NA	NM	NA	NM	NA	23.4753	4.98096	NM	NA	NM	NA	4.37617	1.03445	NM	NA	<0.48	NA	NM	NA	NM	NA
	Hexatriacontane	NM	NA	ND	NA	NM	NA	ND	NA	ND	NA	ND	NA	ND	NA	ND	NA	NM	NA	ND	NA	NM	NA	NM	NA	NM	NA	ND	NA	NM	NA	NM	NA	ND	NA	NM	NA	ND	NA	NM	NA	NM	NA
	Heptatriacontane	NM	NA	6.60048	1.36072	NM	NA	ND	NA	5.34605	1.10212	6.06979	1.25132	6.58211	1.35694	6.11072	1.25976	NM	NA	16.1458	3.32853	NM	NA	NM	NA	NM	NA	37.4652	7.72365	NM	NA	NM	NA	7.09306	1.46227	NM	NA	ND	NA	NM	NA	NM	NA
	Octriacontane	NM	NA	17.8372	3.67722	NM	NA	16.7526	3.45364	13.256	2.7328	17.8951	3.68917	28.659	5.9082	30.0607	6.19717	NM	NA	43.5343	8.97484	NM	NA	NM	NA	NM	NA	133.819	27.5874	NM	NA	NM	NA	14.4944	2.9881	NM	NA	ND	NA	NM	NA	NM	NA
	Nonatriacontane	NM	NA	4.97994	1.02664	NM	NA	ND	NA	ND	NA	4.07001	0.839053	10.8921	2.24547	8.41644	1.73509	NM	NA	13.2808	2.73791	NM	NA	NM	NA	NM	NA	45.7687	9.43545	NM	NA	NM	NA	ND	NA	NM	NA	ND	NA	NM	NA	NM	NA
	Tetracontane	NM	NA	ND	NA	NM	NA	ND	NA	ND	NA	ND	NA	ND	NA	ND	NA	NM	NA	ND	NA	NM	NA	NM	NA	NM	NA	31.0749	6.40625	NM	NA	NM	NA	ND	NA	NM	NA	ND	NA	NM	NA	NM	NA
Other Alkanes
	Norpristane	NM	NA	1.01583	0.245804	NM	NA	2.43376	0.581735	0.211392	0.0689373	0.786894	0.208788	0.992014	0.254038	2.25736	0.495088	NM	NA	11.2977	2.36594	NM	NA	NM	NA	NM	NA	41.2472	8.52961	NM	NA	NM	NA	2.39266	0.537116	NM	NA	<0.29	NA	NM	NA	NM	NA
	Pristane	NM	NA	3.7111	0.768075	NM	NA	8.43303	1.74738	1.26654	0.264264	3.72836	0.773528	3.41694	0.70907	8.90951	1.83952	NM	NA	29.1984	6.02388	NM	NA	NM	NA	NM	NA	110.936	22.8732	NM	NA	NM	NA	7.21021	1.4908	NM	NA	1.0194	0.213744	NM	NA	NM	NA
	Phytane	NM	NA	<0.11	NA	NM	NA	<0.23	NA	<0.13	NA	<0.14	NA	<0.13	NA	<0.11	NA	NM	NA	<0.24	NA	NM	NA	NM	NA	NM	NA	<0.36	NA	NM	NA	NM	NA	<0.16	NA	NM	NA	<0.15	NA	NM	NA	NM	NA
	Squalane	NM	NA	19.8153	4.08503	NM	NA	11.2146	2.31195	7.97266	1.64361	10.2302	2.10901	9.52257	1.96313	6.52395	1.34495	NM	NA	17.8193	3.67355	NM	NA	NM	NA	NM	NA	60.8526	12.5451	NM	NA	NM	NA	12.119	2.49839	NM	NA	3.66577	0.755718	NM	NA	NM	NA
Anhydrosugars
	Levoglucosan	NM	NA	469.633	96.8172	NM	NA	2014.56	415.312	381.147	78.5755	150.832	31.0948	281.674	58.0685	286.738	59.1126	NM	NA	238.623	49.1934	NM	NA	NM	NA	NM	NA	158.417	32.6586	NM	NA	NM	NA	795.198	163.934	NM	NA	3355.5	691.754	NM	NA	NM	NA
	Mannosan	NM	NA	8.72684	1.79908	NM	NA	21.9707	4.52938	6.55383	1.35111	5.55291	1.14476	8.49749	1.7518	1.81874	0.374943	NM	NA	8.00094	1.64944	NM	NA	NM	NA	NM	NA	3.24055	0.668056	NM	NA	NM	NA	29.498	6.08117	NM	NA	110.126	22.703	NM	NA	NM	NA
	Galactosan	NM	NA	2.48965	0.513254	NM	NA	4.48164	0.923913	1.91013	0.393784	0.947639	0.195361	0.404276	0.0833436	0.301424	0.0621401	NM	NA	0.46282	0.0954128	NM	NA	NM	NA	NM	NA	0.697287	0.143749	NM	NA	NM	NA	2.09641	0.432186	NM	NA	7.21516	1.48744	NM	NA	NM	NA
Lignin Decomposition Products
	Vanillin	NM	NA	ND	NA	NM	NA	1.73808	0.358315	ND	NA	ND	NA	0.282178	0.0581724	0.0211479	0.00435974	NM	NA	0.102177	0.0210644	NM	NA	NM	NA	NM	NA	0.146168	0.0301333	NM	NA	NM	NA	0.166711	0.0343684	NM	NA	2.7923	0.575647	NM	NA	NM	NA
	Syringealdehyde	NM	NA	8.15398	1.68099	NM	NA	27.7109	5.71275	4.02996	0.830798	2.53541	0.522688	6.01092	1.23918	8.27257	1.70543	NM	NA	17.3637	3.57962	NM	NA	NM	NA	NM	NA	27.9393	5.75984	NM	NA	NM	NA	10.8443	2.2356	NM	NA	166.387	34.3016	NM	NA	NM	NA
	Vanillic acid	NM	NA	18.8412	3.88421	NM	NA	86.328	17.797	7.69334	1.58602	50.6496	10.4417	60.2795	12.4269	12.3797	2.55214	NM	NA	43.0806	8.88129	NM	NA	NM	NA	NM	NA	75.7005	15.6061	NM	NA	NM	NA	58.7853	12.1189	NM	NA	180.862	37.2857	NM	NA	NM	NA
	Syringic acid	NM	NA	9.21243	1.89919	NM	NA	30.8057	6.35075	3.64196	0.75081	18.7891	3.87347	21.624	4.45791	8.00841	1.65098	NM	NA	14.3466	2.95763	NM	NA	NM	NA	NM	NA	50.68	10.4479	NM	NA	NM	NA	37.5472	7.74056	NM	NA	114.356	23.5751	NM	NA	NM	NA
Sterols
	Cholesterol	NM	NA	<0.05	NA	NM	NA	<0.11	NA	<0.06	NA	<0.06	NA	<0.06	NA	<0.05	NA	NM	NA	<0.11	NA	NM	NA	NM	NA	NM	NA	<0.17	NA	NM	NA	NM	NA	<0.07	NA	NM	NA	<0.07	NA	NM	NA	NM	NA
	Stigmasterol	NM	NA	2.25201	0.466389	NM	NA	3.2484	0.675834	<0.05	NA	<0.05	NA	<0.05	NA	0.875119	0.185844	NM	NA	<0.10	NA	NM	NA	NM	NA	NM	NA	<0.14	NA	NM	NA	NM	NA	<0.06	NA	NM	NA	7.04039	1.45263	NM	NA	NM	NA
	b-Sitosterol	NM	NA	6.71826	1.38581	NM	NA	9.56189	1.97384	3.309	0.684205	3.69128	0.76319	2.88052	0.596289	3.20843	0.663265	NM	NA	7.0317	1.45355	NM	NA	NM	NA	NM	NA	3.6914	0.775756	NM	NA	NM	NA	13.8833	2.86296	NM	NA	21.2693	4.38527	NM	NA	NM	NA
	Campesterol	NM	NA	2.31758	0.50218	NM	NA	2.84013	0.667478	<0.19	NA	<0.19	NA	<0.18	NA	0.651442	0.205555	NM	NA	<0.34	NA	NM	NA	NM	NA	NM	NA	<0.51	NA	NM	NA	NM	NA	6.16801	1.2898	NM	NA	9.74962	2.02076	NM	NA	NM	NA
	Cholestanol / Coprostanol	NM	NA	<0.17	NA	NM	NA	<0.34	NA	<0.2	NA	<0.21	NA	<0.2	NA	<0.17	NA	NM	NA	<0.36	NA	NM	NA	NM	NA	NM	NA	<0.54	NA	NM	NA	NM	NA	<0.23	NA	NM	NA	<0.22	NA	NM	NA	NM	NA
	Stigmastanol	NM	NA	<0.22	NA	NM	NA	<0.45	NA	<0.26	NA	<0.27	NA	<0.26	NA	<0.22	NA	NM	NA	<0.47	NA	NM	NA	NM	NA	NM	NA	<0.71	NA	NM	NA	NM	NA	<0.30	NA	NM	NA	<0.29	NA	NM	NA	NM	NA
Other Componds
	Monopalmitin	NM	NA	1.19725	0.246819	NM	NA	1.59096	0.327985	0.410418	0.0846099	0.0503643	0.0103829	0.654032	0.134832	0.0866545	0.0178643	NM	NA	0.495928	0.102238	NM	NA	NM	NA	NM	NA	<1.1	NA	NM	NA	NM	NA	2.04436	0.421455	NM	NA	3.529	0.727522	NM	NA	NM	NA
	Monoolein	NM	NA	ND	NA	NM	NA	ND	NA	ND	NA	ND	NA	ND	NA	ND	NA	NM	NA	ND	NA	NM	NA	NM	NA	NM	NA	ND	NA	NM	NA	NM	NA	ND	NA	NM	NA	ND	NA	NM	NA	NM	NA
	Monostearin	NM	NA	0.276516	0.0570052	NM	NA	0.757172	0.156095	0.36778	0.0758197	0.443724	0.0914761	1.38386	0.28529	1.1952	0.246398	NM	NA	2.10527	0.434012	NM	NA	NM	NA	NM	NA	2.78753	0.574663	NM	NA	NM	NA	1.55633	0.320846	NM	NA	2.11386	0.435784	NM	NA	NM	NA
Symbols and abbreviations
<	indicates below the method dection limit
NM	not measured
ND	not detected
NA	not applicable

## Sheet: Figure S1
Figure S1: Quartz fiber filter containing PM emitted from peat burning.

## Sheet: Figure S2
Figure S2: Linear regression of modified combustion efficiency (MCE) and burn depth.

## Sheet: Figure S3
Figure S3: Organic mass fraction of hopanoids.
